# Supplementary material
Source: ML conference proceedings conference paper supplement (https://proceedings.neurips.cc/paper_files/paper/2020/hash/066f182b787111ed4cb65ed437f0855b-Abstract.html)
Supplement: Supplementary file [file 066f182b787111ed4cb65ed437f0855b-Supplemental.pdf]

# Supplementary Material to Improving Inference for Neural Compression

## S1 Stochastic Annealing

Here we provide conceptual illustrations of our stochastic annealing idea on a simple example.

Consider the following scalar optimization problem over integers,

$$\underset{z \in \mathbb{Z}}{\text{minimize}} \quad f(z) = z^2$$

Following our stochastic annealing method in Section 3.2, we let  $x \in \mathbb{R}$  be a continuous proxy variable, and  $r \in \{(1, 0), (0, 1)\}$  be the one-hot vector of stochastic rounding direction. We let  $r$  follow a Bernoulli distribution with temperature  $\tau > 0$ ,

$$q_\tau(r|x) = \begin{cases} \exp\{-\psi(x - \lfloor x \rfloor)/\tau\}/C(x, \tau) & \text{if } r = (1, 0) \\ \exp\{-\psi(\lceil x \rceil - x)/\tau\}/C(x, \tau) & \text{if } r = (0, 1) \end{cases}$$

where

$$C(x, \tau) = \exp\{-\psi(x - \lfloor x \rfloor)/\tau\} + \exp\{-\psi(\lceil x \rceil - x)/\tau\}$$

is the normalizing constant.

The stochastic optimization problem for SGA is then

$$\begin{aligned} \underset{x \in \mathbb{R}}{\text{minimize}} \quad \ell_\tau(x) &:= \mathbb{E}_{q_\tau(r|x)}[f(r \cdot (\lfloor x \rfloor, \lceil x \rceil))] \\ &= \frac{\exp\{-\psi(x - \lfloor x \rfloor)/\tau\}}{C(x, \tau)} f(\lfloor x \rfloor) + \frac{\exp\{-\psi(\lceil x \rceil - x)/\tau\}}{C(x, \tau)} f(\lceil x \rceil) \end{aligned}$$

Below we plot the rounding probability  $q_\tau(r = (0, 1)|x)$  and the SGA objective  $\ell_\tau$  as a function of  $x$ , at various temperatures.

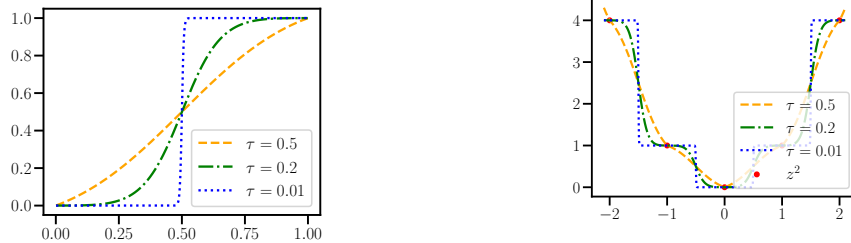

Figure S1: Illustration of the probability  $q_\tau(r = (0, 1)|x)$  of rounding *up*, on the interval  $(0, 1)$ , at various temperatures.

Figure S2: Graphs of stochastic annealing objective  $\ell_\tau$  at various temperatures.  $\ell_\tau$  interpolates the discrete optimization problem between integers, and approaches  $\text{round}(x)^2$  as  $\tau \rightarrow 0$ .

## S2 Model Architecture and Training

As mentioned in the main text, the *Base Hyperprior* model uses the same architecture as in Table 1 of Minnen et al. [2018] except without the “Context Prediction” and “Entropy Parameters” components (this model was referred to as “Mean & Scale Hyperprior” in this work). The model is mostly already implemented in `bmshj2018.py`<sup>1</sup> from Ballé et al., Ballé et al. [2018], and we modified their implementation to double the number of output channels of the `HyperSynthesisTransform` to predict both the mean and (log) scale of the conditional prior  $p(\mathbf{y}|\mathbf{z})$  over the latents  $\mathbf{y}$ .

As mentioned in Section 3.3 and 4, lossy bits-back modifies the above *Base Hyperprior* as follows:

<sup>1</sup><https://github.com/tensorflow/compression/blob/master/examples/bmshj2018.py>

1. The number of output channels of the hyper inference network is doubled to compute both the mean and diagonal (log) variance of Gaussian  $q(\mathbf{z}|\mathbf{x})$ ;
2. The hyperprior  $p(\mathbf{z})$  is no longer restricted to the form of a flexible density model convolved with the uniform distribution on  $[-0.5, 0.5]$ ; instead it simply uses the flexible density, as described in the Appendix of Ballé et al. [2018].

We trained our models (both the *Base Hyperprior* and the bits-back variant) on CLIC-2018<sup>2</sup> images using minibatches of eight  $256 \times 256$  randomly-cropped image patches, for  $\lambda \in \{0.001, 0.0025, 0.005, 0.01, 0.02, 0.04, 0.08\}$ . Following Ballé et al. [2018], we found that increasing the number of latent channels helps avoid the “bottleneck” effect and improve rate-distortion performance at higher rates, and increased the number of latent channels from 192 to 256 for models trained with  $\lambda = 0.04$  and 0.08. All models were trained for 2 million steps, except the ones with  $\lambda = 0.001$  which were trained for 1 million steps, and  $\lambda = 0.08$  which were trained for 3 million steps. Our code and pre-trained models can be found at <https://github.com/mandt-lab/improving-inference-for-neural-image-compression>.

### S3 Hyper-Parameters of Various Methods Considered

Given a pre-trained model (see above) and image(s)  $\mathbf{x}$  to be compressed, our experiments in Section 4 explored hybrid amortized-iterative inference to improve compression performance. Below we provide hyper-parameters of each method considered:

**Stochastic Gumbel Annealing.** In all experiments using SGA (including the *SGA+BB* experiments, which optimized over  $\hat{\mathbf{y}}$  using SGA), we used the Adam optimizer with an initial learning rate of 0.005, and an exponentially decaying temperature schedule  $\tau(t) = \min(\exp\{-ct\}, 0.5)$ , where  $t$  is the iteration number, and  $c > 0$  controls the speed of the decay. We found that lower  $c$  generally increases the number of iterations needed for convergence, but can also yield slightly better solutions; in all of our experiments we set  $c = 0.001$ , and obtained good convergence with 2000 iterations.

**Temperature Annealing Schedule for SGA.** We initially used a naive temperature schedule,  $\tau(t) = \tau_0 \exp\{-ct\}$  for SGA, where  $\tau_0$  is the initial temperature (typically set to 0.5 to simulate soft quantization), and found that aggressive annealing with a large decay factor  $c$  can lead to suboptimal solutions, as seen with  $c = 0.002$  or  $c = 0.001$  in the left subplot of Figure S3. We found that we can overcome the suboptimality from fast annealing by an initial stage of optimization at a fixed temperature before annealing: in the initial stage, we fix the temperature to some relatively high value  $\tau_0$  (to simulate soft discretization), and run the optimization for  $t_0$  steps such that the R-D objective roughly converges. We demonstrate this in the right subplot of Figure S3, where we modify the naive schedule to  $\tau(t) = \min\{\tau_0, \tau_0 \exp\{-c(t - t_0)\}\}$ , so that SGA roughly converges after  $t_0 = 700$  steps at temperature  $\tau_0 = 0.5$  before annealing. As can be seen, the results of SGA are robust to different choices of decay factor  $c$ , with  $c = 0.002$  and  $c = 0.001$  giving comparably good results to  $c = 0.0005$  but with faster convergence.

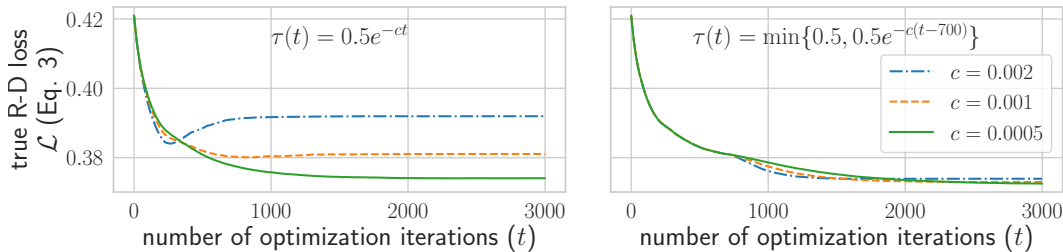

Figure S3: Comparing different annealing schedules for SGA (Section 3.2).

**Lossy bits-back.** In the *SGA+BB* experiments, line 2 of the encode subroutine of Algorithm 1 performs joint optimization w.r.t.  $\mu_{\mathbf{y}}$ ,  $\mu_{\mathbf{z}}$ , and  $\sigma_{\mathbf{z}}^2$  with Black-box Variational Inference (BBVI), using

<sup>2</sup><https://www.compression.cc/2018/challenge/>

the reparameterization trick to differentiate through Gumbel-softmax samples for  $\mu_y$ , and Gaussian samples for  $(\mu_z, \sigma_z^2)$ . We used Adam with an initial learning rate of 0.005, and ran 2000 stochastic gradient descent iterations; the optimization w.r.t.  $\mu_y$  (SGA) used the same temperature annealing schedule as above. The `reproducible_BBVI` subroutine of Algorithm 1 used Adam with an initial learning rate of 0.003 and 2000 stochastic gradient descent iterations; we used the same random seed for the encoder and decoder for simplicity, although a hash of  $\hat{y}$  can also be used instead.

**Alternative Discretization Methods** In Figure 3 and ablation studies of Section 4, all alternative discretization methods were optimized with Adam for 2000 iterations to compare with SGA. The initial learning rate was 0.005 for *MAP*, *Uniform Noise*, and *Deterministic Annealing*, and 0.0001 for *STE*. All methods were tuned on a best-effort basis to ensure convergence, except that *STE* consistently encountered convergence issues even with a tiny learning rate (see [Yin et al., 2019]). The rate-distortion results for *MAP* and *STE* were calculated with early stopping (i.e., using the intermediate  $(\hat{y}, \hat{z})$  with the lowest true rate-distortion objective during optimization), just to give them a fair chance. Lastly, the comparisons in Figure 3 used the *Base Hyperprior* model trained with  $\lambda = 0.0025$ .

## S4 Additional Results

On Kodak, we achieve the following BD rate savings: 17% for *SGA+BB* and 15% for *SGA* relative to *Base Hyperprior*; 17% for *SGA+BB* and 15% for *SGA* relative to BPG. On Tecnick, we achieve the following BD rate savings: 20% for *SGA+BB* and 19% for *SGA* relative to *Base Hyperprior*; 22% for *SGA+BB* and 21% for *SGA* relative to BPG.

Our experiments were conducted on a Titan RTX GPU with 24GB RAM; we observed about a  $100\times$  slowdown from our proposed iterative inference methods (compared to standard encoder network prediction), similar to what has been reported in [Campos et al., 2019]. Note that our proposed standalone variant [M1] with SGA changes only compression and does not affect *decompression* speed (which is more relevant, e.g., for images on a website with many visitors).

Below we provide an additional qualitative comparison on the Kodak dataset, and report detailed rate-distortion performance on the Tecnick [Asuni and Giachetti, 2014] dataset.

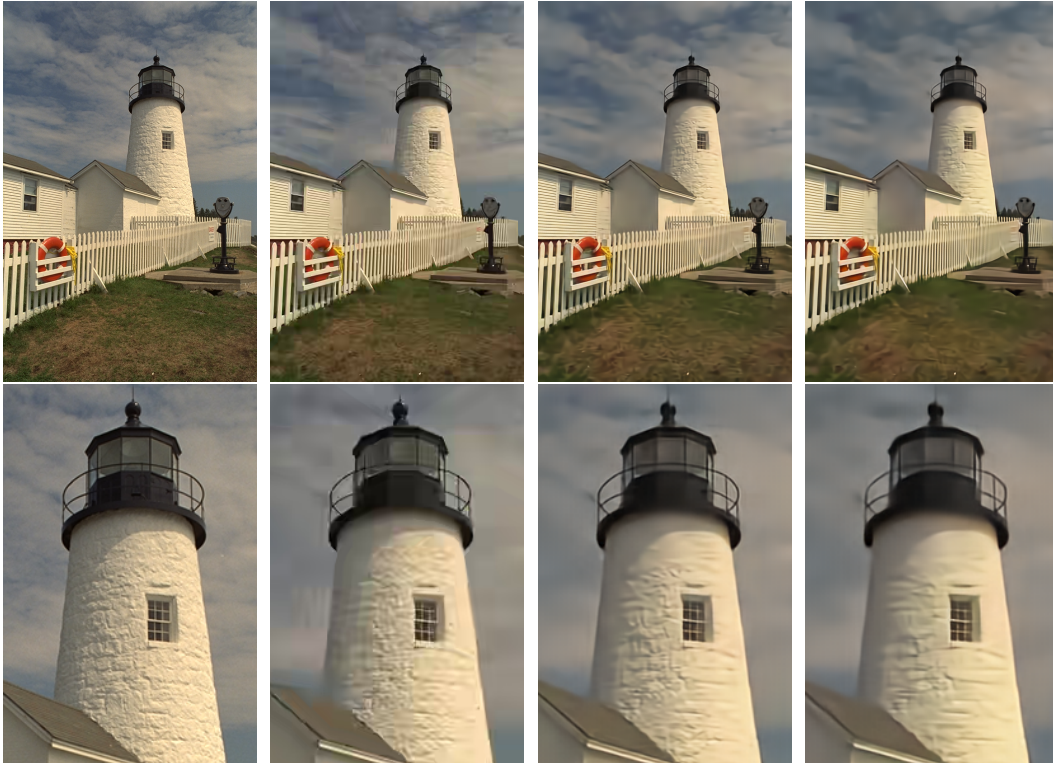

(a) Original image (kodim19 from [Kodak](#))      (b) BPG 4:4:4; 0.143 BPP (PSNR = 29.3)      (c) Proposed (SGA); 0.142 BPP (PSNR = 29.8)      (d) [[Minnen et al., 2018](#)]; 0.130 BPP (PSNR = 28.5)

Figure S4: Qualitative comparison of lossy compression performance on an image from the [Kodak](#) dataset. Figures in the bottom row focus on the same cropped region of images in the top row. Our method (c; [M1] in Table 1) significantly boosts the visual quality of the *Base Hyperprior* method (d; [M3] in Table 1) at similar bit rates. Unlike the learning-based methods (subfigures c,d), the classical codec BPG (subfigure b) introduces blocking and geometric artifacts near the rooftop, and ringing artifacts around the contour of the lighthouse.

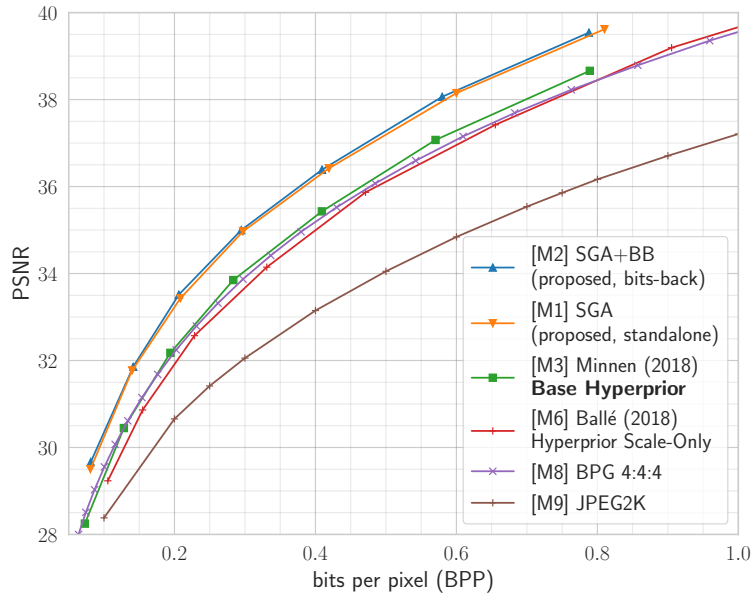

Figure S5: Rate-distortion performance comparisons on the Tecnick [Asuni and Giachetti, 2014] dataset against existing baselines. Image quality measured in Peak Signal-to-Noise Ratio (PSNR) in RGB; higher values are better.

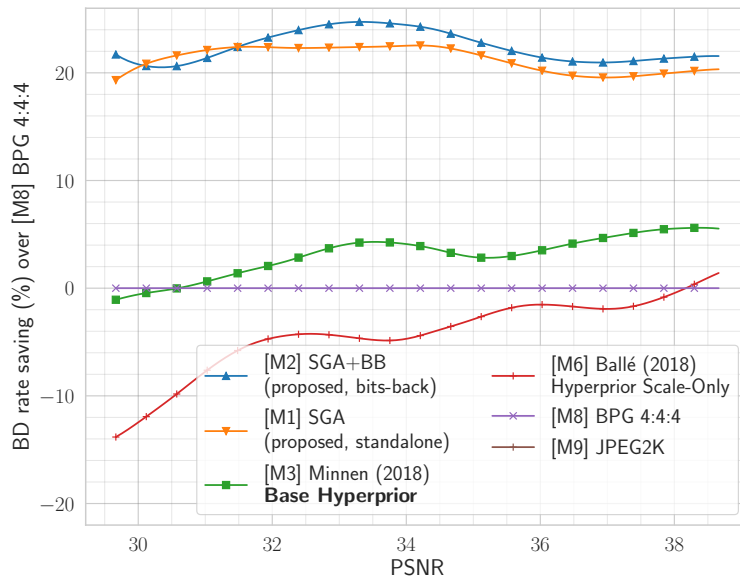

Figure S6: BD rate savings (%) relative to BPG as a function of PSNR, computed from R-D curves (Figure S5) on Tecnick. Higher values are better.
